# 1 Normal feeding movements expressed by dimensionality 2 reduction of whole-body joint motions using principal 3 component analysis

4

5 Jun Nakatake<sup>1</sup>, Shigeaki Miyazaki<sup>1</sup>, Hideki Arakawa<sup>1</sup>, Etsuo Chosa<sup>2</sup>

6

7 <sup>1</sup>Rehabilitation unit, University of Miyazaki Hospital, Miyazaki-shi, Miyazaki, Japan

8 <sup>2</sup>Community medical center, University of Miyazaki Hospital, Miyazaki-shi, Miyazaki, Japan

9

10 Corresponding author:

11 Jun Nakatake

12 Rehabilitation unit, University of Miyazaki Hospital, Miyazaki-shi, Miyazaki, Japan

13 Email address: [jyun\\_nakatake@med.miyazaki-u.ac.jp](mailto:jyun_nakatake@med.miyazaki-u.ac.jp) (JN)

14

## 15 Abstract

16 **Background.** Understanding elementary feeding movements and postures is essential for  
17 improving assessment and intervention strategies in occupational therapy, particularly for  
18 individuals with eating difficulties, and for educating caregivers and students. However, the  
19 current assessment tools lack precision in evaluating complex feeding movements and often  
20 rely on subjective judgments rather than objective measures. We aimed to determine  
21 elementary movements and postures corresponding to different feeding phases using principal  
22 component analysis (PCA).

23 **Methods.** This cross-sectional observational study was conducted at a Local National  
24 University Hospital and included 45 healthy, right-handed adult volunteers (23 men and 22  
25 women) aged 20–39 years (mean age, 27.3 years), with no neurological or musculoskeletal  
26 impairments. Movements during yogurt feeding using a spoon were captured with a  
27 three-dimensional inertial sensor motion capture system. Principal components (PCs) and their  
28 scores were derived from PCA of whole-body joint motion data across four feeding phases. PC  
29 scores were compared between phases using Friedman’s and post-hoc tests.

30 **Results.** The primary PC, representing whole-body movement, accounted for 50.0% of the  
31 variance; the second PC, associated with hand direction changes, accounted for 13.7%. The  
32 cumulative variance of the first six PCs was 87.4%, including individual body-part movements  
33 and fixations or combinations of these. Significant differences existed between feeding phases,  
34 particularly in the reaching and transport phases, which showed greater whole-body movement  
35 than that during the spooning and mouth phases. Hand direction changes were more prominent  
36 during the spooning phase than during the mouth phase.

37 **Conclusions.** PCA helped determine key elementary movements and their corresponding  
38 feeding phases, which can be used to assess patients with feeding difficulties and guide  
39 occupational therapy interventions.

40

## 41 **Introduction**

42 Eating difficulties caused by injuries or illnesses result in physiological, psychological, and  
43 social challenges (Cipriano-Crespo et al., 2020; Klinke et al. 2013). Impaired self-feeding  
44 skills are further associated with malnutrition (Ciliz et al., 2023). Occupational therapy  
45 addresses these issues by focusing on swallowing, posture, movement, equipment, care  
46 methods, and habits, and providing psychosocial interventions for patients (Boop et al., 2017;  
47 Philipps et al. 2012). Several interventions have been developed to improve posture in children  
48 (Bhattacharjya et al., 2021; Mlinda, Leyna, & Massawe, 2018) and provide intensive training  
49 for specific movements (Jo, Noh, & Kam, 2020; Treger et al., 2012). Additionally, early  
50 rehabilitation using feeding devices in intensive care units has been introduced (Koester et al.,  
51 2018).

52 Eating evaluations are often conducted using assessment tools such as the functional  
53 independence measure (Uniform Data System for Medical Rehabilitation, 1990) and the  
54 modified Barthel index (Shah, Vanclay, & Cooper, 1989), which include eating as one of  
55 several daily tasks. Patients are assessed on an ordinal scale based on judgments regarding  
56 voluntary movements, caregiver support, or types of equipment used. An eating-specific  
57 screening tool, the minimal eating observation form II, has also been developed (Westergren et  
58 al., 2009). This tool consists of three items observed on a nominal or ordinal scale, focusing on  
59 the sitting position. Practitioners use these assessments to evaluate the eating conditions of  
60 patients, set treatment goals, and guide feeding movements and postures. However, targeted  
61 movements and postures may be assessed subjectively owing to the experience of practitioners,  
62 and the rationale for these assessments remains insufficient.

63 While studies had reported summarized measurements and waveforms regarding  
64 joint angles necessary for normal feeding activities (Nagao, 2004; Doğan et al., 2019; van  
65 Andel et al., 2008), these movement and posture patterns correspond to different time phases  
66 (Nakatake et al., 2021). The results suggest substantial changes in whole-body joint angles  
67 during the phases of reaching for the dish and transporting food to the mouth. Additionally,  
68 motion direction varies during the phases of spooning food and taking it into the mouth.  
69 Understanding these joint motions, which involves changes in each joint angle over time, can  
70 enhance assessments and interventions aimed at improving the movements or postures of  
71 patients (Kontaxis et al., 2009). However, relying solely on individual joint motion attached to  
72 corresponding time phases to understand feeding movements is insufficient. Practitioners often  
73 recognize the movements of patients based on approximate body part motions rather than  
74 individual joint motions, which may involve a combination of joint motions, namely  
75 coordination. These movements during feeding, such as reaching for food, manipulating the  
76 direction of the palm, approaching the food with the mouth, or stabilizing the trunk to support  
77 the upper limbs, may involve coordinated, complex joint motions that play significant roles in

78 daily living. However, their specific functions remain unclear.

79 To address this issue, we employed principal component analysis (PCA) with  
80 quantitative kinematic measurements. This method highlights specific fictitious features of  
81 data through dimensional reduction, summarizing variables, which is advantageous for  
82 analyzing rich biomechanical variables (Daffertshofer et al., 2004). PCA has revealed  
83 elementary movement (EM) patterns from gross movement during tasks, such as reaching  
84 (Kaminski, 2007) and trunk bending (Tricon et al., 2007). Furthermore, bilateral upper-limb  
85 movements (Burns et al., 2017) and postures in sign languages (Bigand et al., 2021) have been  
86 categorized into patterns. EM is interpreted as a combination of joint motions for movements  
87 that interact with the environment or within the body.

88 We hypothesized that EMs could be defined from combinations of joint motions  
89 during feeding movements and that the appearance of EMs would differ between feeding  
90 phases. Therefore, we assessed the secondary analysis of a previous dataset (Nakatake et al.,  
91 2021) and aimed to determine the EMs involved in the feeding phases of whole-body joint  
92 motion in healthy individuals using PCA. The identified normal feeding movements and  
93 postures could provide clinical observational assessments or intervention cues for patients with  
94 eating difficulties.

95

## 96 **Materials and methods**

### 97 **Participants**

98 The study adhered to the STROBE guidelines (von Elm et al., 2007) and was presented in  
99 preprint server (Nakatake et al., 2024). The sample for this study was included in a previous  
100 study (Nakatake et al., 2021), and the study protocol was approved by the Research Ethics  
101 Committee of the Faculty of Medicine at the University of Miyazaki (Miyazaki-shi, Japan)  
102 (approval number: O-1501). As we could not contact previous study participants, they were  
103 informed about the study through the institution's website and provided with the option to opt  
104 out of participation at any time. Consequently, informed consent was indirectly obtained from  
105 participants who did not decline to participate in this study. Furthermore, the authors did not  
106 have access to information that could identify individual participants of the previous study  
107 after data collection. In total, 50 participants were recruited from our institutional staff from  
108 April 2013 to October 2017, meeting the following criteria: aged 20–39 years, right-handed,  
109 and without neurological or musculoskeletal impairments. Individuals who were left-handed  
110 for regular spoon use were excluded.

111

### 112 **Measurement procedures**

113 The measurement procedures performed in the occupational therapy room at the institution and  
114 instrument details have been previously described (Nakatake et al., 2021). The feeding  
115 movements of participants were recorded using a three-dimensional motion capture system  
116 (Xsens MVN system; Xsens Technologies B.V., Netherlands). This system provides kinematic  
117 output of a biomechanical whole-body model composed of 17 inertial sensors attached to the  
118 participant's head, sternum, scapulas, pelvis, upper-arms, forearms, hands, upper-legs,

119 lower-legs, and feet, consisting of 23 body segments, including the head, neck, pelvis, four  
120 vertebrae, scapulae, upper arms, forearms, hands, upper legs, lower legs, feet, and toes. The  
121 neutral (zero) position of the joint angles was defined as the joint angle when standing upright  
122 with feet parallel, one foot width apart, upper limbs alongside the body, palms facing forward,  
123 and the head oriented forward.

124 Participants sat on a stool of height 40 cm without a backrest, with a table adjusted at  
125 their elbow height that were positioned in front of their trunk at a distance of 10 cm. They  
126 were instructed to use their right hand to reach for yogurt in a bowl placed on the table, scoop it  
127 with a stainless spoon (17.5 cm in length, 41 g in weight), transport it, and bring it to their  
128 mouth at a comfortable pace, repeating the sequence thrice. The aim was to capture voluntary  
129 movements; therefore, movements from after the spoon left the mouth to before the second  
130 instance, and from after the second instance to before the third instance, were analyzed.

131

### 132 **Sample selection**

133 Given that participants performed their own feeding movements, five individuals displaying  
134 the following movements were excluded from the standardization of normal feeding  
135 movements: unnecessary upper limb elevation, shaking yogurt off the spoon while transporting  
136 it to the mouth, looking away, shaking the head vertically while reaching for the bowl, repeated  
137 spooning, or separating yogurt with the spoon. The final sample included 45 participants (23  
138 men and 22 women) with a mean age of 27.3 years (standard deviation [SD] = 5.1) and an  
139 average height of 164.8 cm (SD = 8.6).

140

### 141 **Data analysis**

142 Joint angles during a successive feeding cycle, consisting of reaching the hand to the bowl  
143 (reaching phase), spooning yogurt (spooning phase), transporting yogurt to the mouth  
144 (transport phase), and bringing yogurt to the mouth (mouth phase), were identified by  
145 confirming pictures in recorded movies synchronized to the system and extracted from the  
146 biomechanical model. Data were collected at the right shoulder (flexion/extension,  
147 abduction/adduction, and internal/external rotation), elbow (flexion/extension), forearm  
148 (pronation/supination), wrist (palmar/dorsal flexion and radial/ulnar deviation), C7-T1  
149 (flexion/extension and right/left lateral flexion), and hip (flexion/extension) at a frequency of  
150 120 Hz. A typical case is displayed in Fig 1. The change in joint angles in each feeding phase  
151 was calculated using maximum and minimum values. Performance times during the phases  
152 were also recorded.

153 This study performed PCA which summarizes entire variables to theoretical fictitious  
154 components called principal components (PCs). PCs consist of sum of substantial  
155 measurements loaded by coefficients. Accordingly, each data point has scores of PC. To test  
156 our hypothesis, we analyzed changes in joint angles and performance times (11 variables) for  
157 one sample containing four feeding phases for each participant (data points of  $45 \times 4 = 180$ )  
158 using PCA. Subsequently, the PC was selected to ensure that the cumulative variance ratio  
159 (contribution ratio to all PC) was  $\geq 85\%$ . PCs indicating EMs were interpreted from the  
160 loadings. Additionally, PC scores were calculated and compared between feeding phases using

161 the Friedman test, with the significance level set at  $p < .05$ . Post-hoc analysis was performed  
162 using the Wilcoxon signed-rank test with Bonferroni correction ( $p < .008$ ). The effect size  $r$  was  
163 interpreted as medium = |0.3| and large = |0.5| (Hugh & Hugh, 2009).

164

## 165 **Results**

### 166 **Principal component analysis**

167 The first PC accounted for 50.0% of the variance, followed by the second PC with 13.7%. The  
168 variances for PCs 3 through 6 were 7.8%, 6.5%, 5.0%, and 4.3%, respectively. The cumulative  
169 variance across the first six PCs totaled 87.4%. The loadings for each PC (Fig 2) allowed for  
170 the following interpretations: PC 1 represented whole-body movement over time; PC 2  
171 indicated changes in hand direction while maintaining head stability; PC 3 involved elbow  
172 joint motion with stable shoulder joint angles; PC 4 captured lateral neck motion with fixed  
173 elbow angles; PC 5 reflected wrist palmar/dorsal flexion; and PC 6 highlighted trunk stability  
174 achieved via hip joint fixation.

175

### 176 **Movements characterizing feeding phases**

177 Friedman's test revealed significant differences in PC scores across feeding phases for PCs 1–5  
178 (PC 1,  $\chi^2 = 122$ ,  $p < .0001$ ; PC 2,  $\chi^2 = 109$ ,  $p < .0001$ ; PC 3,  $\chi^2 = 32$ ,  $p < .0001$ ; PC 4,  $\chi^2 = 66$ ,  $p$   
179  $< .0001$ ; PC 5,  $\chi^2 = 18$ ,  $p = .0004$ ). PC 6 did not show significant differences between phases ( $\chi^2$   
180  $= 8$ ,  $p = .0554$ ).

181 The PC scores for each phase across the first five PCs are summarized in Fig 3 and  
182 Tables S2 and S3. PC 1 scores were highest in the reaching phase, followed by the transport,  
183 spooning, and mouth phases, with significant differences and large to medium effect sizes  
184 between phases (reaching vs. spooning,  $z = -5.8$ ,  $p < .0001$ ,  $r = -0.62$ ; reaching vs. transport,  $z =$   
185  $-5.8$ ,  $p < .0001$ ,  $r = -0.61$ ; reaching vs. mouth,  $z = -5.8$ ,  $p < .0001$ ,  $r = -0.62$ ; spooning vs.  
186 transport,  $z = -5.8$ ,  $p < .0001$ ,  $r = -0.62$ ; spooning vs. mouth,  $z = -3.5$ ,  $p = .0005$ ,  $r = -0.36$ ;  
187 transport vs. mouth,  $z = -5.8$ ,  $p < .0001$ ,  $r = -0.62$ ).

188 For PC 2, scores between all phases were significant with large effect to medium  
189 sizes, in the order of spooning, reaching, mouth, and transport phases (reaching vs. spooning,  
190  $z = -3.1$ ,  $p < .0018$ ,  $r = -0.33$ ; reaching vs. transport,  $z = -5.8$ ,  $p < .0001$ ,  $r = -0.62$ ; reaching vs.  
191 mouth,  $z = -5.5$ ,  $p < .0001$ ,  $r = -0.58$ ; spooning vs. transport,  $z = -5.8$ ,  $p < .0001$ ,  $r = -0.62$ ;  
192 spooning vs. mouth,  $z = -5.8$ ,  $p < .0001$ ,  $r = -0.62$ ; transport vs. mouth,  $z = -4.9$ ,  $p < .0001$ ,  $r =$   
193  $-0.52$ ).

194 PC 3 scores were higher in the reaching, spooning, and transport phases than in the  
195 mouth phase, with large to small effects (reaching vs. mouth,  $z = -2.7$ ,  $p = .0066$ ,  $r = -0.29$ ;  
196 spooning vs. mouth,  $z = -5.5$ ,  $p < .0001$ ,  $r = -0.58$ ; transport vs. mouth,  $z = -3.1$ ,  $p = .0019$ ,  $r =$   
197  $-0.33$ ).

198 For PC 4, the mouth phase had the highest scores (mouth vs. reaching,  $z = -2.8$ ,  $p$   
199  $= .0045$ ,  $r = -0.30$ ; mouth vs. spooning,  $z = -5.6$ ,  $p < .0001$ ,  $r = -0.59$ ; mouth vs. transport,  $z =$   
200  $-5.6$ ,  $p < .0001$ ,  $r = -0.59$ ), whereas the transport phase had the lowest scores (transport vs.  
201 reaching,  $z = -5.2$ ,  $p < .0001$ ,  $r = -0.55$ ; transport vs. spooning,  $z = -4.0$ ,  $p = .0001$ ,  $r = -0.43$ ),



202 with significant differences and large or medium effect sizes.

203 Finally, PC 5 scores were significantly higher in the spooning and transport phases  
204 than in the reaching phase, with medium effect sizes (spooning vs. reaching,  $z = -3.3, p = .0009,$   
205  $r = -0.35$ ; transport vs. reaching,  $z = -3.3, p = .0009, r = -0.35$ ).

206

## 207 **Discussion**

208 In this study, we aimed to identify elementary feeding movements and postures based on joint  
209 kinematics using PCA and to compare these movements across different feeding phases. The  
210 analysis revealed that the six PCs accounted for over 85% of the variance across all phases,  
211 supporting the hypothesis that EMs are defined by combinations of joint motions during  
212 feeding and that their occurrence varies across feeding phases. These findings suggest that  
213 understanding EMs can enhance the ability of occupational therapists to assess and improve  
214 feeding movements and postures through targeted interventions, such as positioning, specific  
215 movement training, and the use of adaptive devices.

216 The primary EM, involving whole-body movement for mouth and hand coordination,  
217 was most prominent in the reaching phase, followed by the transport phase. The second EM,  
218 which involved changes in hand direction by coordinating wrist joint motions with the fixed  
219 neck flexion angle, was prominent in the spooning phase followed by reaching phase. The  
220 third EM, characterized by elbow motion with fixed shoulder angles, was frequently observed  
221 in the spooning, transport, and reaching phases. Lateral neck motion with fixed elbow angles  
222 was mostly observed in the mouth phase, but not in the transport phase. The spooning and  
223 transport phases involved more wrist flexion/extension movements. Trunk stability, achieved  
224 through hip joint fixation, was consistently recognized across all phases (Fig 4).

225 The whole-body movement observed in the reaching and transport phases aligns with  
226 that reported previously (Nakatake et al., 2021), confirming the coordination of upper and  
227 lower limb and neck joint motions. This theoretical EM was revealed by the application of PCA  
228 to the biomechanical data. During the reaching phase, the shoulder flexes, abducts, and  
229 internally rotates, whereas the elbow extends, positioning the hand toward the bowl. The  
230 transport phase is characterized by the movement of the upper limb toward the mouth. The  
231 range of motion in hip flexion/extension during reaching facilitates the trunk's return to a  
232 neutral position, which is necessary for hand-reaching motion within upper limb length  
233 (Kaminski, Bock, & Gentile, 1995). Additionally, head and trunk movements during the  
234 transport phase bring the mouth closer to the food (Chinju et al., 2024; Inada et al., 2012; van  
235 der Kamp & Steenbergen, 1999). The coordination of arm, neck, and trunk motions establishes  
236 the coupling of whole-body movements across the two feeding phases. The other PCs were  
237 defined as theoretical EMs for the first time. Notably, PCs 3 and 6 indicated shoulder or hip joint  
238 fixation in most feeding phases, highlighting the stabilization of proximal body parts. Stability  
239 is crucial for the functional performance of the upper extremities and reportedly enhances  
240 neutral trunk position (Gillen et al., 2007) and shoulder and trunk fixation (Olczak,  
241 Truszczyńska-Baszak, & Mróz, 2022) in individuals with disabilities. Therefore, healthy  
242 feeding likely requires stabilizing the upper arm and trunk.

243 Our PCA revealed that various body segment movements dimensionally reduced the  
244 configuration of normal feeding: PC 2 and PC 3 in the reaching phase, PC 2, PC 3, and PC 5 in  
245 the spooning phase, PC 3 and PC 5 in the transport phase, and PC 4 in the mouth phase. These  
246 upper-body joint motions, which configure each PC in the corresponding feeding phases, have  
247 been confirmed in recent research (Doğan et al., 2019; Nakatake et al., 2021). Each EM can be  
248 interpreted as follows: PC 2, which involves positioning the hand by changing the two coupled  
249 wrist joint motions, represents the approach and manipulation of an object. PC 3 reflects hand  
250 transport away from the trunk or closing the mouth via elbow joint motions, representing an  
251 upper limb reaching movement. These movements are well-established functions of the upper  
252 extremities (Kapandji, Owerko, & Anderson, 2019). Additionally, the elbow joint motion of  
253 PC 3 may be adapted for spooning yogurt. Counterintuitively, food intake into the mouth  
254 involved neck lateral flexion (PC 4). Wrist flexion/extension (PC 5) enables manipulating and  
255 transporting foods, with these aspects warranting consideration.

256 The results of this study suggest that normal feeding involves various elements related  
257 to neck, trunk, and upper extremity movements and postures across different feeding phases.  
258 This objective knowledge clarifies our practical experience and supports more effective  
259 interventions for patients with eating difficulties, as outlined in the following implications.  
260 Practitioners may assess whether the feeding movements of patients are within normal ranges  
261 using EMs identified through PCA in this study. Treatment goals and programs focused on  
262 specific EMs can be developed to address feeding difficulties. To enhance feeding movements  
263 and postures, practitioners might consider implementing targeted positioning strategies,  
264 intensive movement training, or the use of adaptive devices, along with providing education for  
265 patients and their caregivers or occupational therapy students.

266 This study has some limitations, including its focus on right-handed individuals using  
267 a spoon to eat yogurt, because of the heterogeneity of dominant upper-limb movements  
268 between right- and left-handed individuals (Nelson, Berthier, & Konidaris, 2018). These  
269 specific conditions may influence the observed EMs and warrant further research to better  
270 understand and validate these findings. Individuals exhibiting EMs outside the normal range,  
271 such as the minimum or maximum values of PC 1 during the reaching phase, should be noted in  
272 clinical assessments. In this study, we employed a portable inertial motion capture system,  
273 which offers flexibility in measurement settings. However, alternative methods, such as  
274 single-camera markerless capture (Scott et al., 2022) or visual kinematic observation  
275 (Bernhardt, Bate, & Matyas, 1998), may offer additional benefits in clinical practice (Demers  
276 & Levin, 2017) and should be evaluated for their applicability.

277

## 278 **Conclusions**

279 The PCA of whole-body kinematic data identified several EMs associated with normal feeding,  
280 each corresponding to specific functional phases. These findings provide a theoretical  
281 foundation for defining normal feeding movements and postures. Further research is warranted  
282 to validate the application of these findings to clinical practices related to addressing feeding  
283 difficulties.

284

285 **References**

286 Bernhardt J, Bate PJ, Matyas TA. 1998. Accuracy of observational kinematic assessment of  
287 upper-limb movements. *Physical Therapy* 78:259–270. DOI: 10.1093/ptj/78.3.259.

288 Bhattacharjya S, Lenker JA, Schraeder R, Ghosh A, Ghosh R, Mandal S. 2021.  
289 Comprehensive needs assessment to ensure appropriate rehabilitation training for  
290 community-based workers and caregivers in India. *American Journal of Occupational*  
291 *Therapy: Official Publication of the American Occupational Therapy Association* 75:  
292 7501205130p1-7501205130p10. DOI: 10.5014/ajot.2021.040097.

293 Bigand F, Prigent E, Berret B, Braffort A. 2021. Decomposing spontaneous sign language  
294 into elementary movements: A principal component analysis-based approach. *PLOS*  
295 *ONE* 16:e0259464. DOI: 10.1371/journal.pone.0259464.

296 Boop C, Smith J, Kannenberg K. 2017. The practice of occupational therapy in feeding,  
297 eating, and swallowing. *American Journal of Occupational Therapy: Official*  
298 *Publication of the American Occupational Therapy Association*  
299 71(Supplement\_2):7112410015p1-7112410015p13. DOI: [10.5014/ajot.2017.716S04](https://doi.org/10.5014/ajot.2017.716S04).

300 Burns MK, Patel V, Florescu I, Pochiraju KV, Vinjamuri R. 2017. Low-dimensional  
301 synergistic representation of bilateral reaching movements. *Frontiers in Bioengineering*  
302 *& Biotechnology* 5:2. DOI: 10.3389/fbioe.2017.00002.

303 Chinju K, Yamamoto Y, Inada E, Iwashita Y, Sato H. 2024. Analysis of head motions during  
304 food intake in Japanese adults using a new motion capture system. *Archives of Oral*  
305 *Biology* 160:105908. DOI: [10.1016/j.archoralbio.2024.105908](https://doi.org/10.1016/j.archoralbio.2024.105908).

306 Ciliz O, Tulek Z, Hanagasi H, Bilgic B, Gurvit IH. 2023. Eating difficulties and relationship  
307 with nutritional status among patients with dementia. *Journal of Nursing Research:*  
308 *JNR* 31:e260. DOI: 10.1097/jnr.0000000000000538.



- 309 Cipriano-Crespo C, Rodríguez-Hernández M, Cantero-Garlito P, Mariano-Juárez L. 2020.  
310 Eating experiences of people with disabilities: A qualitative study in Spain. *Healthcare*  
311 8:512. DOI: [10.3390/healthcare8040512](https://doi.org/10.3390/healthcare8040512).
- 312 Daffertshofer A, Lamoth CJC, Meijer OG, Beek PJ. 2004. PCA in studying coordination and  
313 variability: A tutorial. *Clinical Biomechanics* 19:415–428. DOI:  
314 [10.1016/j.clinbiomech.2004.01.005](https://doi.org/10.1016/j.clinbiomech.2004.01.005).
- 315 Demers M, Levin MF. 2017. Do activity level outcome measures commonly used in  
316 neurological practice assess upper-limb movement quality? *Neurorehabilitation &*  
317 *Neural Repair* 31:623–637. DOI: [10.1177/1545968317714576](https://doi.org/10.1177/1545968317714576).
- 318 Doğan M, Koçak M, Onursal Kılınç Ö, Ayvat F, Sütçü G, Ayvat E, Kılınç M, Ünver Ö, Aksu  
319 Yıldırım S. 2019. Functional range of motion in the upper extremity and trunk joints:  
320 Nine functional everyday tasks with inertial sensors. *Gait & Posture* 70:141–147. DOI:  
321 [10.1016/j.gaitpost.2019.02.024](https://doi.org/10.1016/j.gaitpost.2019.02.024).
- 322 Gillen G, Boiangiu C, Neuman M, Reinstein R, Schaap Y. 2007. Trunk posture affects upper  
323 extremity function of adults. *Perceptual & Motor Skills* 104:371–380. DOI:  
324 [10.2466/pms.104.2.371-380](https://doi.org/10.2466/pms.104.2.371-380).
- 325 Hugh C, Hugh C. 2009. *Research Methods and Statistics in Psychology*. 5th ed. Routledge.  
326 DOI: [10.4324/9780203769669](https://doi.org/10.4324/9780203769669).
- 327 Inada E, Saitoh I, Nakakura-Ohshima K, Maruyama T, Iwasaki T, Murakami D, Tanaka M,  
328 Hayasaki H, Yamasaki Y. 2012. Association between mouth opening and upper body  
329 movement with intake of different-size food pieces during eating. *Archives of Oral*  
330 *Biology* 57:307–313. DOI: [10.1016/j.archoralbio.2011.08.023](https://doi.org/10.1016/j.archoralbio.2011.08.023).
- 331 Jo E-J, Noh D-H, Kam K-Y. 2020. Effects of contextual interference on feeding training in  
332 patients with stroke. *Human Movement Science* 69:102560. DOI:  
333 [10.1016/j.humov.2019.102560](https://doi.org/10.1016/j.humov.2019.102560).

- 334 Kaminski TR. 2007. The coupling between upper and lower extremity synergies during  
335 whole body reaching. *Gait & Posture* 26:256–262. DOI:  
336 [10.1016/j.gaitpost.2006.09.006](https://doi.org/10.1016/j.gaitpost.2006.09.006).
- 337 Kaminski TR, Bock C, Gentile AM. 1995. The coordination between trunk and arm motion  
338 during pointing movements. *Experimental Brain Research* 106:457–466. DOI:  
339 10.1007/BF00231068.
- 340 Kapandji IA, Owerko C, Anderson A. 2019. Physiology of the joints, Volume 1 *The Upper*  
341 *Limb*. 7th ed. Handspring Publisher LTD.
- 342 Klinke ME, Wilson ME, Hafsteinsdóttir TB, Jónsdóttir H. 2013. Recognizing new  
343 perspectives in eating difficulties following stroke: A concept analysis. *Disability &*  
344 *Rehabilitation* 35:1491–1500. DOI: 10.3109/09638288.2012.736012.
- 345 Koester K, Troeller H, Panter S, Winter E, Patel JJ. 2018. Overview of Intensive Care  
346 Unit-related physical and functional impairments and rehabilitation-related devices.  
347 *Nutrition in Clinical Practice: Official Publication of the American Society for*  
348 *Parenteral & Enteral Nutrition* 33:177–184. DOI: [10.1002/ncp.10077](https://doi.org/10.1002/ncp.10077).
- 349 Kontaxis A, Cutti AG, Johnson GR, Veeger HEJ. 2009. A framework for the definition of  
350 standardized protocols for measuring upper-extremity kinematics. *Clinical*  
351 *Biomechanics (Bristol, Avon)* 24:246–253. DOI: 10.1016/j.clinbiomech.2008.12.009.
- 352 Mlinda SJ, Leyna GH, Massawe A. 2018. The effect of a practical nutrition education  
353 programme on feeding skills of caregivers of children with cerebral palsy at Muhimbili  
354 National Hospital, in Tanzania. *Child: Care, Health & Development* 44:452–461. DOI:  
355 [10.1111/cch.12553](https://doi.org/10.1111/cch.12553).
- 356 Nagao T. 2004. Joint *Motion Analysis of the Upper Extremity Required for Eating Activities*.  
357 *Bulletin of Health Sciences Kobe* 19:13–31.
- 358 Nakatake J, Miyazaki S, Arakawa H, Chosa E. 2024. Normal feeding movements expressed  
359 by dimensionality reduction of whole-body joint motions using principal component

- 360 analysis. *medRxiv* (accessed on November 30, 2024). DOI:  
361 10.1101/2024.09.14.24313686.
- 362 Nakatake J, Totoribe K, Arakawa H, Chosa E. 2021. Exploring whole-body kinematics when  
363 eating real foods with the dominant hand in healthy adults. *PLOS ONE* 16:e0259184.  
364 DOI: 10.1371/journal.pone.0259184.
- 365 Nelson EL, Berthier NE, Konidaris GD. 2018. Handedness and Reach-to-Place Kinematics in  
366 Adults: Left-Handers Are Not Reversed Right-Handers. *Journal of Motor Behavior*  
367 50:381–391. DOI: [10.1080/00222895.2017.1363698](https://doi.org/10.1080/00222895.2017.1363698).
- 368 Olczak A, Truszczyńska-Baszak A, Mróz J. 2022. Change in the results of motor coordination  
369 and handgrip strength depending on age and body position-An observational study of  
370 stroke patients and healthy volunteers. *International Journal of Environmental*  
371 *Research & Public Health* 19:4703. DOI: [10.3390/ijerph19084703](https://doi.org/10.3390/ijerph19084703).
- 372 Philipps J, Reinhart C, Rohde A, Virgil K, Moser C. 2012. Feeding and swallowing. *Journal*  
373 *of Occupational Therapy, Schools, & Early Intervention* 5:90–104. DOI:  
374 10.1080/19411243.2012.701524.
- 375 Scott B, Seyres M, Philp F, Chadwick EK, Blana D. 2022. Healthcare applications of single  
376 camera markerless motion capture: A scoping review. *PeerJ* 10:e13517. DOI:  
377 10.7717/peerj.13517.
- 378 Shah S, Vanclay F, Cooper B. 1989. Improving the sensitivity of the Barthel index for stroke  
379 rehabilitation. *Journal of Clinical Epidemiology* 42:703–709. DOI:  
380 [10.1016/0895-4356\(89\)90065-6](https://doi.org/10.1016/0895-4356(89)90065-6).
- 381 Treger I, Aidinof L, Lehrer H, Kalichman L. 2012. Modified constraint-induced movement  
382 therapy improved upper limb function in subacute poststroke patients: A small-scale  
383 clinical trial. *Topics in Stroke Rehabilitation* 19:287–293. DOI: 10.1310/tsr1904-287.

- 384 Tricon V, Le Pellec-Muller A, Martin N, Mesure S, Azulay J-P, Vernazza-Martin S. 2007.  
385 Balance control and adaptation of kinematic synergy in aging adults during forward  
386 trunk bending. *Neuroscience Letters* 415:81–86. DOI: [10.1016/j.neulet.2006.12.046](https://doi.org/10.1016/j.neulet.2006.12.046).
- 387 Uniform data system for medical rehabilitation. 1990. *Guide for Use of the Uniform Data Set*  
388 *for Medical Rehabilitation. Data Management, S., & Center for Functional Assessment,*  
389 *R. State University of New York at Buffalo.*
- 390 van Andel CJ, Wolterbeek N, Doorenbosch CAM, Veeger DHEJ, Harlaar J. 2008. Complete  
391 3D kinematics of upper extremity functional tasks. *Gait & Posture* 27:120–127. DOI:  
392 [10.1016/j.gaitpost.2007.03.002](https://doi.org/10.1016/j.gaitpost.2007.03.002).
- 393 van der Kamp J, Steenbergen B. 1999. The kinematics of eating with a spoon: Bringing the  
394 food to the mouth, or the mouth to the food? *Experimental Brain Research* 129:68–76.  
395 DOI: [10.1007/s002210050937](https://doi.org/10.1007/s002210050937).
- 396 von Elm E, Altman DG, Eggar M, Pocock SJ, Gøtzsche PC, Vandenbroucke JP. 2007.  
397 STROBE initiative. The Strengthening the Reporting of Observational Studies in  
398 Epidemiology (STROBE) statement: Guidelines for observational studies. *Lancet*  
399 370:1453–1457. DOI: [10.1016/s0140-6736\(07\)61602-X](https://doi.org/10.1016/s0140-6736(07)61602-X).
- 400 Westergren A, Lindholm C, Mattsson A, Ulander K. 2009. Minimal eating observation form:  
401 Reliability and validity. *Journal of Nutrition, Health & Aging* 13:6–12. DOI:  
402 [10.1007/s12603-009-0002-4](https://doi.org/10.1007/s12603-009-0002-4).
- 403

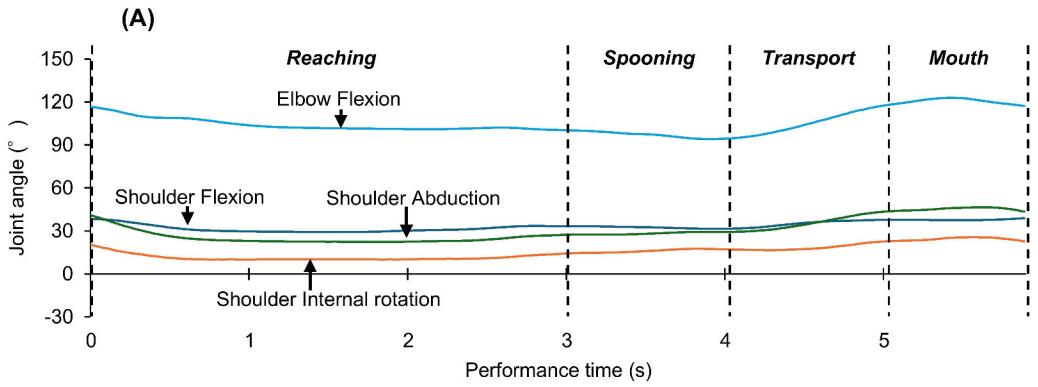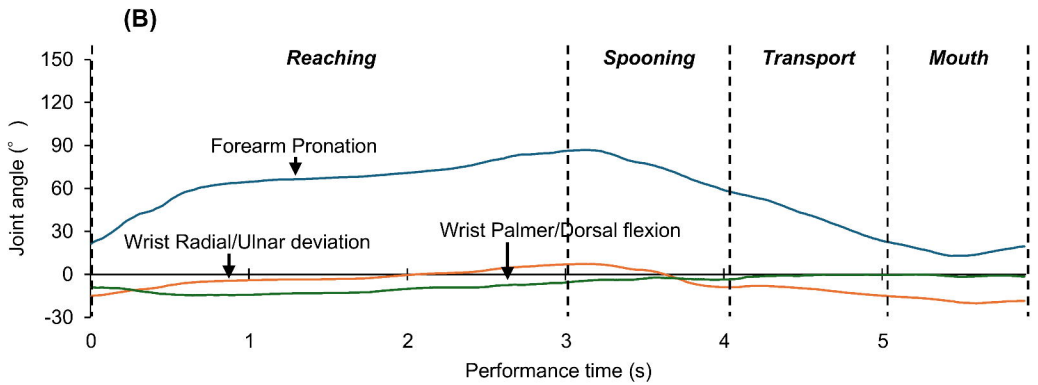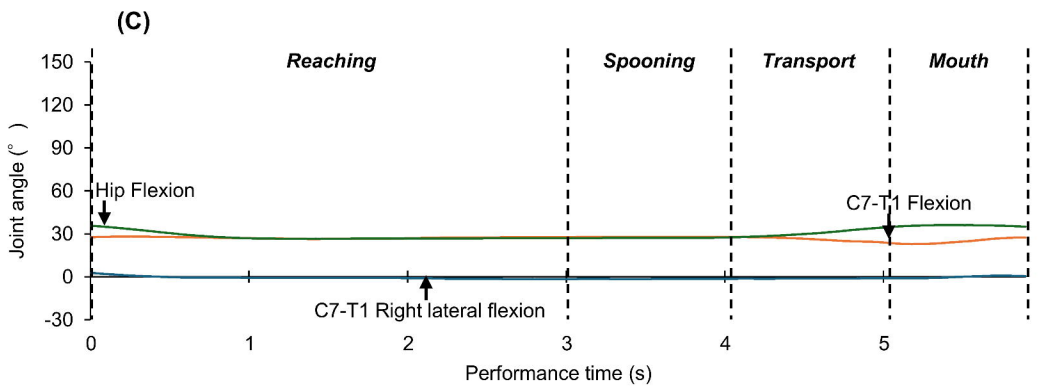

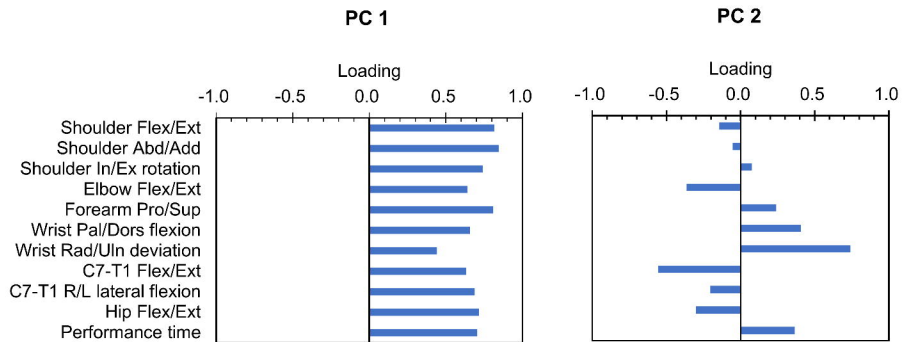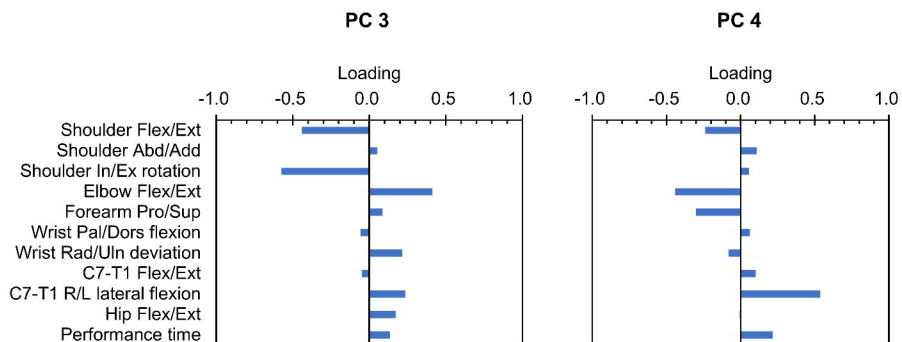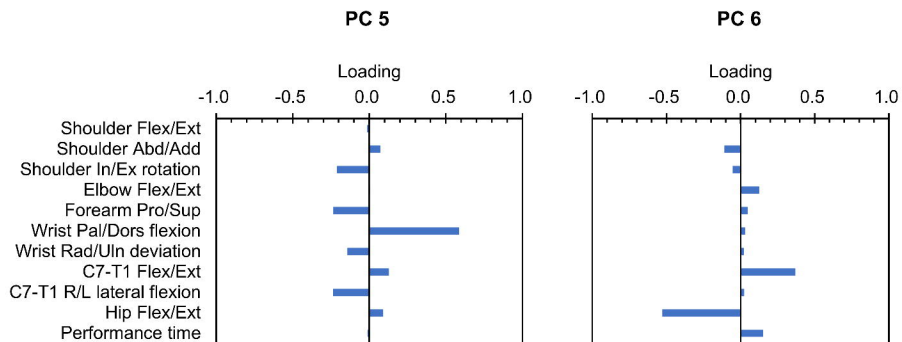



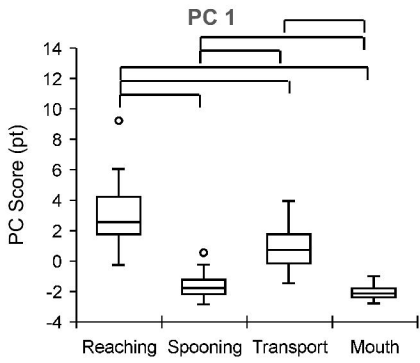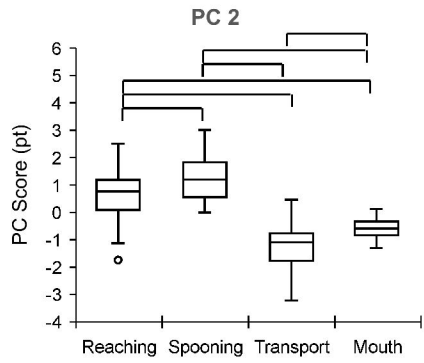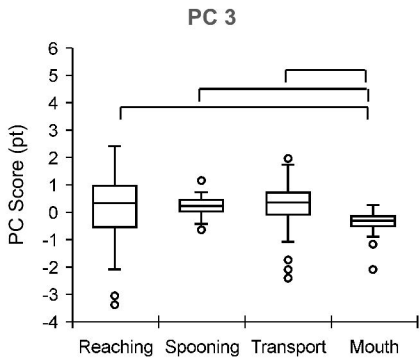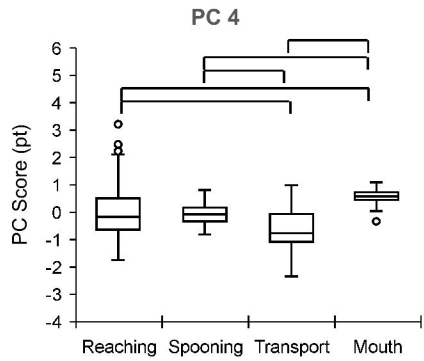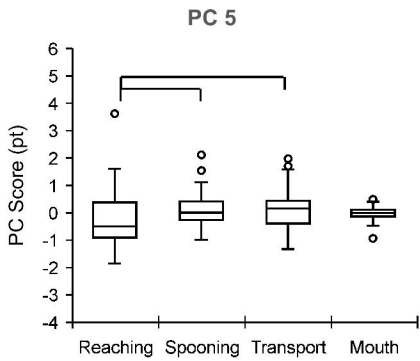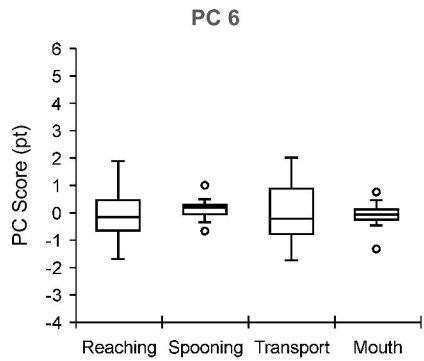

Reaching phase

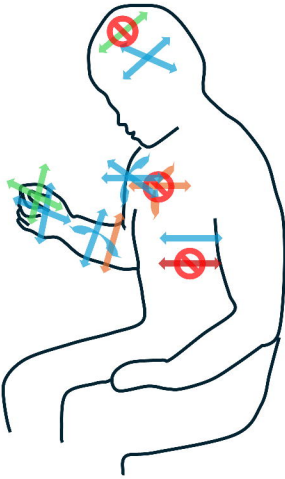

Spooning phase

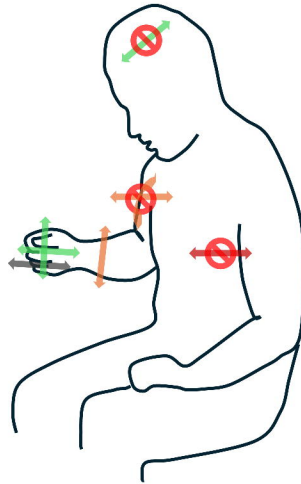

Transport phase

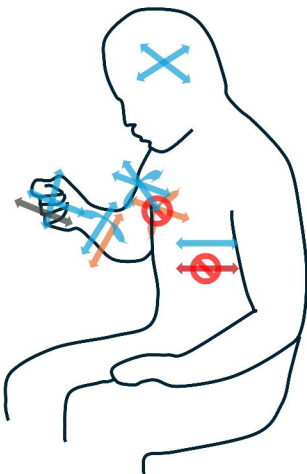

Mouth phase

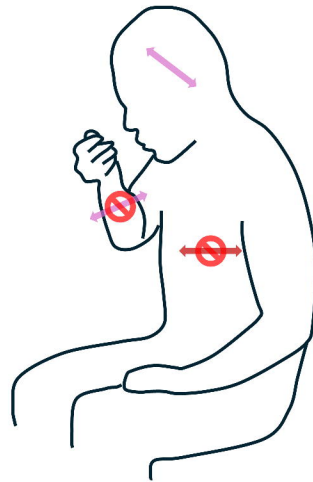

**Fig 1. Typical waveforms of whole-body joint angle change across all feeding phases.**

(A) Changes in the shoulder and elbow joint angles. (B) Changes in the forearm and wrist joint angles. (C) Changes in the neck (C7-T1) and hip joint angle. In all figures, the vertical axis indicates the joint angle, the horizontal axis indicates the performance time, and the vertical dotted line indicates the initial and final durations of each feeding phase.

**Fig 2. Parameter loadings of PCs.**

Vertical axis indicates parameters, and horizontal axis indicates loadings.

PC, principal component.

**Fig 3. Comparison of PC scores between feeding phases.**

Vertical and horizontal axes indicate the PC score and feeding phases, respectively. The upper, middle, and lower lines of the boxplot indicate the upper, median, and lower quartiles, respectively. The upper and lower bars indicate the maximum and minimum values, respectively. Dots indicate outliers. Box plots connected by the above lines show significant differences between feeding phases, as determined using post-hoc analysis of the Wilcoxon signed-rank test with Bonferroni correction ( $p < .008$ ).

PC, principal component.

**Fig 4. Image of PCs embedded in feeding phases.**

The line art shows human movements and postures while sitting during each feeding phase. The arrow directions indicate the possibility of motion corresponding to each body part. Red circles with oblique lines indicate that the motion of the overlapping arrows does not occur. Light blue indicates whole-body movements that require time during the reaching and transport phases. Green indicates changing the hand direction while maintaining the neck flexion angle during the reaching and spooning phases. Orange indicates the elbow motion that maintains shoulder flexion and rotation angles during the reaching, spooning, and transporting phases. Pink indicates lateral neck motion while maintaining the elbow angle in the mouth phase. Gray indicates wrist palm/dorsal flexion during spooning, transport, and mouth phases. Brown color indicates trunk posture

fixation during all feeding phases.

PC, principal component.

**Table S1. Performance time analyzed using principal component analysis.**

**Table S2. PC score for each feeding phase.**

Values are presented as median (interquartile range). PC, principal component.

**Table S3. Post-hoc comparison of PC scores between feeding phases.**

The comparison was performed using Wilcoxon signed-rank test with Bonferroni correction ( $p < 0.008$ ). PC, principal component.
